# Supplementary material for: The Survey of H5N1 Flu Virus in Wild Birds in 14 Provinces of China from 2004 to 2007
Source: PLoS One. 2009 Sep 9;4(9):e6926. doi: 10.1371/journal.pone.0006926 (PMC2735031; doi:10.1371/journal.pone.0006926)
Supplement: Table S1 — Bird species involved in the study. Table S1 includes data on all species in which H5N1 virus was detected by RT-PCR, including geographical sampling location and sample size. (0.07 MB XLS) [file pone.0006926.s001.xls]

## Sheet: 56 Birds Species
Order	Family	Species	Migratory Status	Positive Number	Sampled Number	Positive Rate	Virus Detection
Anseriformes	Anatidae	Bar-headed Goose (Anser indicus)	Y	13	675	0.0192593	2
		Lesser White-fronted Goose (Anser erythropus)	Y	3	143	0.020979
		Mallard (Anas platyrhynchos)	Y	20	458	0.0436681	1
		Ruddy Shel Duck (Tadorna ferruginea)	Y	5	329	0.0151976
		Pintail (Anas acuta)	Y	20	487	0.0410678
		Common Teal(Anas crecca)	Y	5	161	0.0310559
		Tufted Duck (Aythya fuligula)	Y	9	524	0.0171756
		Common Pochard (Aythya ferina)	Y	0	77	0
		Red-crested Pochard (Rhodonessa rufina)	Y	2	68	0.0294118
		Whooper Swan (Cygnus cygnus)	Y	8	223	0.0358744	1
Charadriformes	Scolopacidae	Eurasian Curlew （Numenius arquata）	Y	3	746	0.00402145	1
Columbiformes	Columbidae	Rock Dove (Columba livia)	N	6	571	0.0105079	1
Coraciformes	Upupidae	Eurasian Hoopoe(Upupa epops)	Y	0	15	0
Gruiformes	Gruidae	Black-necked Crane(Grus nigricollis)	Y	0	68	0
Lariformes	Charadriidae	Kentish Plover (Charadrius alexandrinus)	Y	0	95	0
	Laridae	Pallas's Gull (Larus ichthyaetus)3	Y	6	507	0.0118343	1
		Brown-headed Gull (Larus brunnicephalus)8	Y	16	670	0.0238806	1
		Slaty-backed Gull (Larus schistisagus)	Y	1	298	0.0033557	1
		Common Black-headed Gull (Larus ridibundus)	Y	0	367	0
	Scolopacidae	Dunlin (Calidris alpina)	Y	0	136	0
Passeriformes	Alaudidae	Horned Lark (Eremophila alpestris)	Y or N	0	175	0
		Eurasian Skylark(Alauda arvensis)	Y	1	114	0.00877193
		Mongolian Lark(Melanocorypha mongolica)	N	0	321	0
		Oriental Skylark(Alauda gulgula)	Y or N	0	112	0
	Corvidae	Commom Magpie (Pica pica)	N	0	440	0
		Mongolian Ground Jay(Podoces hendersoni)	N	0	8	0
	Emberizidae	Black-faced Bunting (Emberiza spodocephala)	Y	0	98	0
		Yellow-throated Bunting (Emberiza elegans)	Y	0	391	0
	Fringillidae	Plain Mountain Finch(Leucosticte nemoricola)	Y	1	209	0.00478469
		Long-tailed Rosefinch (Uragus sibiricus)	Y or N	0	356	0
	Paradoxornithidae	Vinous-throated Parrot bill (Paradoxornis webbianus)	N	0	325	0
	Paridae	Great Tit (Parus major)	N	0	358	0
		Yellow-bellied Tit (Parus venustulus)	N	0	239	0
		Green-backed Tit (Parus monticolus)	N	1	166	0.0060241	1
		Marsh Tit (Parus palustris)	N	0	78	0
		Long-tailed Tit (Aegithalos caudatus)	N	0	53	0
	Passeridae	Rock Petronia (Petronia petronia)	N	1	244	0.00409836
		Eurasian Tree Sparrow (Passer montanus)	N	15	1376	0.0109012	4
	Pycnonotidae	Madagascar Bulbul (Hypsipetes leucocephalus)	Y	2	385	0.00519481	1
		Light-vented Bulbul (Pycnonotus sinensis)	N	0	94	0
	Pyrgilauda	Rufous-necked Snowfinch (Pyrgilauda ruficollis)	N	0	25	0
	Sylviidae	Japanese Bush-Warbler (Cettia diphone)	Y	0	90	0
		Yellow-rumped Warbler (Phylloscopus proregulus)	Y	0	125	0
	Timallidae	Grey-cheeked Fulvetta (Alcippe morrisonia)	N	2	285	0.00701754
		White-collared Yuhina (Yuhina diademata)	N	1	354	0.00282486	1
	Turdidae	White-winged Redstart (Phoenicurus erythrogaster)	Y	0	271	0
		Daurian Redstart (Phoenicurus auroreus)	Y	0	127	0
		Ala Shan Redstart(Phoenicurus alaschanicus)	N	0	5	0
		Black Redstart(Phoenicurus ochruros)	N	0	5	0
		Plumbeous Water Redstart(Rhyacornis fuliginosus)	N	0	9	0
		Siberian Blue Robin (Luscinia cyane)	Y	0	42	0
		Scaly Thrush (Zoothera dauma)	Y	2	273	0.00732601	1
		Grey-backed Thrush (Turdus hortulorum)	Y	0	167	0
Podicipediformes	Podicipedidae	Little Grebe (Tachybaptus ruficollis)	Y or N	0	158	0
Pelecaniformes	Phalacrocoracidae	Great Cormorant(Phalacrocorax carbo)	Y or N	6	347	0.0172911
Strigiformes	Strigidae	Long-eared Owl(Asio otus)	Y	0	29	0
Total: 10	23	56		149	14472		17

## Sheet: Sample Number of 14 Provinces 
Order	Family	Species	Qinghai	Gansu	Jilin	Heilongjiang	Shanghai	Anhui	Zhejiang	Henan	Neimenggu	Hubei	Shandong	Shaanxi	Fujian	Hunan
Anseriformes	Anatidae	Bar-headed Goose (Anser indicus)	528	147
		Lesser White-fronted Goose (Anser erythropus)			10	7	39	6				5			76
		Mallard (Anas platyrhynchos)	134				32			14	46			184		48
		Ruddy Shel Duck (Tadorna ferruginea)	138					39			152
		Pintail (Anas acuta)	183		12	51						96			107	38
		Common Teal(Anas crecca)	161
		Tufted Duck (Aythya fuligula)	127				106	157			31	83		4	14	2
		Common Pochard (Aythya ferina)	77
		Red-crested Pochard (Rhodonessa rufina)	68
		Whooper Swan (Cygnus cygnus)	150					14				5		54
Charadriformes	Scolopacidae	Eurasian Curlew （Numenius arquata）			33		1						619			93
Columbiformes	Columbidae	Rock Dove (Columba livia)						81	283	139						68
Coraciformes	Upupidae	Eurasian Hoopoe(Upupa epops)	5			7					3
Gruiformes	Gruidae	Black-necked Crane(Grus nigricollis)	68
Lariformes	Charadriidae	Kentish Plover (Charadrius alexandrinus)									24	42	29
	Laridae	Pallas's Gull (Larus ichthyaetus)3	214	293
		Brown-headed Gull (Larus brunnicephalus)8	389	281
		Slaty-backed Gull (Larus schistisagus)					21						10		267
		Common Black-headed Gull (Larus ridibundus)							158				120	22		67
	Scolopacidae	Dunlin (Calidris alpina)			44	28									64
Passeriformes	Alaudidae	Horned Lark (Eremophila alpestris)	10			31					134
		Eurasian Skylark(Alauda arvensis)	49		29				36
		Mongolian Lark(Melanocorypha mongolica)	21	74	13	78					135
		Oriental Skylark(Alauda gulgula)	11					43							13	45
	Corvidae	Commom Magpie (Pica pica)			30			71			16		23	2	6	292
		Mongolian Ground Jay(Podoces hendersoni)	8
	Emberizidae	Black-faced Bunting (Emberiza spodocephala)						35				63
		Yellow-throated Bunting (Emberiza elegans)				50		102	146							93
	Fringillidae	Plain Mountain Finch(Leucosticte nemoricola)	39	10										160
		Long-tailed Rosefinch (Uragus sibiricus)				5					38			313
	Paradoxornithidae	Vinous-throated Parrot bill (Paradoxornis webbianus)						78	57			126				64
	Paridae	Great Tit (Parus major)				2	92	39	11			207	2	2	1	2
		Yellow-bellied Tit (Parus venustulus)						64	78			43				54
		Green-backed Tit (Parus monticolus)										37		74		55
		Marsh Tit (Parus palustris)				4						7				67
		Long-tailed Tit (Aegithalos caudatus)				2		9				36				6
	Passeridae	Rock Petronia (Petronia petronia)	40	38							63			103
		Eurasian Tree Sparrow (Passer montanus)	58	8	16		46	29	18	686		17	283	69	136	10
	Pycnonotidae	Madagascar Bulbul (Hypsipetes leucocephalus)						16				4			365
		Light-vented Bulbul (Pycnonotus sinensis)						2	39			22				31
	Pyrgilauda	Rufous-necked Snowfinch (Pyrgilauda ruficollis)	25
	Sylviidae	Japanese Bush-Warbler (Cettia diphone)					86		4
		Yellow-rumped Warbler (Phylloscopus proregulus)					9	13		15		88
	Timallidae	Grey-cheeked Fulvetta (Alcippe morrisonia)						6				36			243
		White-collared Yuhina (Yuhina diademata)										76	3		26	249
	Turdidae	White-winged Redstart (Phoenicurus erythrogaster)								99				172
		Daurian Redstart (Phoenicurus auroreus)					5	3		14		105
		Ala Shan Redstart(Phoenicurus alaschanicus)	5
		Black Redstart(Phoenicurus ochruros)	5
		Plumbeous Water Redstart(Rhyacornis fuliginosus)	9
		Siberian Blue Robin (Luscinia cyane)				3	26	12				1
		Scaly Thrush (Zoothera dauma)				2	109					23			139
		Grey-backed Thrush (Turdus hortulorum)				2		1	59							105
Podicipediformes	Podicipedidae	Little Grebe (Tachybaptus ruficollis)					144	1		10					2	1
Pelecaniformes	Phalacrocoracidae	Great Cormorant(Phalacrocorax carbo)	153								28		42			124
Strigiformes	Strigidae	Long-eared Owl(Asio otus)	9							3						17
		Total	2684	851	187	272	716	821	889	980	670	1122	1131	1159	1459	1531

## Sheet: Positive Number of 14 Provinces
Order	Family	Species	Qinghai	Gansu	Jilin	Heilongjiang	Shanghai	Anhui	Zhejiang	Henan	Neimenggu	Hubei	Shandong	Shaanxi	Fujian	Hunan
Anseriformes	Anatidae	Bar-headed Goose (Anser indicus)	12	1
		Lesser White-fronted Goose (Anser erythropus)					1								2
		Mallard (Anas platyrhynchos)	15				1				1			2		1
		Ruddy Shel Duck (Tadorna ferruginea)	3								2
		Pintail (Anas acuta)	18													2
		Common Teal(Anas crecca)	5
		Tufted Duck (Aythya fuligula)	9
		Common Pochard (Aythya ferina)
		Red-crested Pochard (Rhodonessa rufina)	2
		Whooper Swan (Cygnus cygnus)	6											2
Charadriformes	Scolopacidae	Eurasian Curlew （Numenius arquata）											3
Columbiformes	Columbidae	Rock Dove (Columba livia)							3	2						1
Coraciformes	Upupidae	Eurasian Hoopoe(Upupa epops)
Gruiformes	Gruidae	Black-necked Crane(Grus nigricollis)
Lariformes	Charadriidae	Kentish Plover (Charadrius alexandrinus)
	Laridae	Pallas's Gull (Larus ichthyaetus)3	5	1
		Brown-headed Gull (Larus brunnicephalus)8	14	2
		Slaty-backed Gull (Larus schistisagus)													1
		Common Black-headed Gull (Larus ridibundus)
	Scolopacidae	Dunlin (Calidris alpina)
Passeriformes	Alaudidae	Horned Lark (Eremophila alpestris)
		Eurasian Skylark(Alauda arvensis)	1
		Mongolian Lark(Melanocorypha mongolica)
		Oriental Skylark(Alauda gulgula)
	Corvidae	Commom Magpie (Pica pica)
		Mongolian Ground Jay(Podoces hendersoni)
	Emberizidae	Black-faced Bunting (Emberiza spodocephala)
		Yellow-throated Bunting (Emberiza elegans)
	Fringillidae	Plain Mountain Finch(Leucosticte nemoricola)	1
		Long-tailed Rosefinch (Uragus sibiricus)
	Paradoxornithidae	Vinous-throated Parrot bill (Paradoxornis webbianus)
	Paridae	Great Tit (Parus major)
		Yellow-bellied Tit (Parus venustulus)
		Green-backed Tit (Parus monticolus)														1
		Marsh Tit (Parus palustris)
		Long-tailed Tit (Aegithalos caudatus)
	Passeridae	Rock Petronia (Petronia petronia)	1
		Eurasian Tree Sparrow (Passer montanus)								12				2	1
	Pycnonotidae	Madagascar Bulbul (Hypsipetes leucocephalus)													2
		Light-vented Bulbul (Pycnonotus sinensis)
	Pyrgilauda	Rufous-necked Snowfinch (Pyrgilauda ruficollis)
	Sylviidae	Japanese Bush-Warbler (Cettia diphone)
		Yellow-rumped Warbler (Phylloscopus proregulus)
	Timallidae	Grey-cheeked Fulvetta (Alcippe morrisonia)													2
		White-collared Yuhina (Yuhina diademata)														1
	Turdidae	White-winged Redstart (Phoenicurus erythrogaster)
		Daurian Redstart (Phoenicurus auroreus)
		Ala Shan Redstart(Phoenicurus alaschanicus)
		Black Redstart(Phoenicurus ochruros)
		Plumbeous Water Redstart(Rhyacornis fuliginosus)
		Siberian Blue Robin (Luscinia cyane)
		Scaly Thrush (Zoothera dauma)													2
		Grey-backed Thrush (Turdus hortulorum)
Podicipediformes	Podicipedidae	Little Grebe (Tachybaptus ruficollis)
Pelecaniformes	Phalacrocoracidae	Great Cormorant(Phalacrocorax carbo)	6
Strigiformes	Strigidae	Long-eared Owl(Asio otus)
		Total	98	4	0	0	2	0	3	14	3	0	3	6	10	6

## Sheet: Positive Rates of 14 Provinces
Order	Family	Species	Qinghai	Gansu	Jilin	Heilongjiang	Shanghai	Anhui	Zhejiang	Henan	Neimenggu	Hubei	Shandong	Shaanxi	Fujian	Hunan
Anseriformes	Anatidae	Bar-headed Goose (Anser indicus)	0.0227273	0.00680272
		Lesser White-fronted Goose (Anser erythropus)			0	0	0.025641	0				0			0.0263158
		Mallard (Anas platyrhynchos)	0.11194				0.03125			0	0.0217391			0.0108696		0.0208333
		Ruddy Shel Duck (Tadorna ferruginea)	0.0217391					0			0.0131579
		Pintail (Anas acuta)	0.0983607		0	0						0			0	0.0526316
		Common Teal(Anas crecca)	0.0310559
		Tufted Duck (Aythya fuligula)	0.0708661				0	0			0	0		0	0	0
		Common Pochard (Aythya ferina)	0
		Red-crested Pochard (Rhodonessa rufina)	0.0294118
		Whooper Swan (Cygnus cygnus)	0.04					0				0		0.037037
Charadriformes	Scolopacidae	Eurasian Curlew （Numenius arquata）			0		0						0.00484653			0
Columbiformes	Columbidae	Rock Dove (Columba livia)						0	0.0106007	0.0143885						0.0147059
Coraciformes	Upupidae	Eurasian Hoopoe(Upupa epops)	0			0					0
Gruiformes	Gruidae	Black-necked Crane(Grus nigricollis)	0
Lariformes	Charadriidae	Kentish Plover (Charadrius alexandrinus)									0	0	0
	Laridae	Pallas's Gull (Larus ichthyaetus)3	0.0233645	0.00341297
		Brown-headed Gull (Larus brunnicephalus)8	0.0359897	0.00711744
		Slaty-backed Gull (Larus schistisagus)					0						0		0.00374532
		Common Black-headed Gull (Larus ridibundus)							0				0	0		0
	Scolopacidae	Dunlin (Calidris alpina)			0	0									0
Passeriformes	Alaudidae	Horned Lark (Eremophila alpestris)	0			0					0
		Eurasian Skylark(Alauda arvensis)	0.0204082		0				0
		Mongolian Lark(Melanocorypha mongolica)	0	0	0	0					0
		Oriental Skylark(Alauda gulgula)	0					0							0	0
	Corvidae	Commom Magpie (Pica pica)			0			0			0		0	0	0	0
		Mongolian Ground Jay(Podoces hendersoni)	0
	Emberizidae	Black-faced Bunting (Emberiza spodocephala)						0				0
		Yellow-throated Bunting (Emberiza elegans)				0		0	0							0
	Fringillidae	Plain Mountain Finch(Leucosticte nemoricola)	0.025641	0										0
		Long-tailed Rosefinch (Uragus sibiricus)				0					0			0
	Paradoxornithidae	Vinous-throated Parrot bill (Paradoxornis webbianus)						0	0			0				0
	Paridae	Great Tit (Parus major)				0	0	0	0			0	0	0	0	0
		Yellow-bellied Tit (Parus venustulus)						0	0			0				0
		Green-backed Tit (Parus monticolus)										0		0		0.0181818
		Marsh Tit (Parus palustris)				0						0				0
		Long-tailed Tit (Aegithalos caudatus)				0		0				0				0
	Passeridae	Rock Petronia (Petronia petronia)	0.025	0							0			0
		Eurasian Tree Sparrow (Passer montanus)	0	0	0		0	0	0	0.0174927		0	0	0.0289855	0.00735294	0
	Pycnonotidae	Madagascar Bulbul (Hypsipetes leucocephalus)						0				0			0.00547945
		Light-vented Bulbul (Pycnonotus sinensis)						0	0			0				0
	Pyrgilauda	Rufous-necked Snowfinch (Pyrgilauda ruficollis)	0
	Sylviidae	Japanese Bush-Warbler (Cettia diphone)					0		0
		Yellow-rumped Warbler (Phylloscopus proregulus)					0	0		0		0
	Timallidae	Grey-cheeked Fulvetta (Alcippe morrisonia)						0				0			0.00823045
		White-collared Yuhina (Yuhina diademata)										0	0		0	0.00401606
	Turdidae	White-winged Redstart (Phoenicurus erythrogaster)								0				0
		Daurian Redstart (Phoenicurus auroreus)					0	0		0		0
		Ala Shan Redstart(Phoenicurus alaschanicus)	0
		Black Redstart(Phoenicurus ochruros)	0
		Plumbeous Water Redstart(Rhyacornis fuliginosus)	0
		Siberian Blue Robin (Luscinia cyane)				0	0	0				0
		Scaly Thrush (Zoothera dauma)				0	0					0			0.0143885
		Grey-backed Thrush (Turdus hortulorum)				0		0	0							0
Podicipediformes	Podicipedidae	Little Grebe (Tachybaptus ruficollis)					0	0		0					0	0
Pelecaniformes	Phalacrocoracidae	Great Cormorant(Phalacrocorax carbo)	0.0392157								0		0			0
Strigiformes	Strigidae	Long-eared Owl(Asio otus)	0							0						0
